# Supplementary material
Source: Springer Nature journal article supplement (https://www.springermedizin.de/resource/supplementary/13058_2013_3429_MOESM4_ESM.pdf/9704142)
Supplement: MOESM4 [file 9704142]

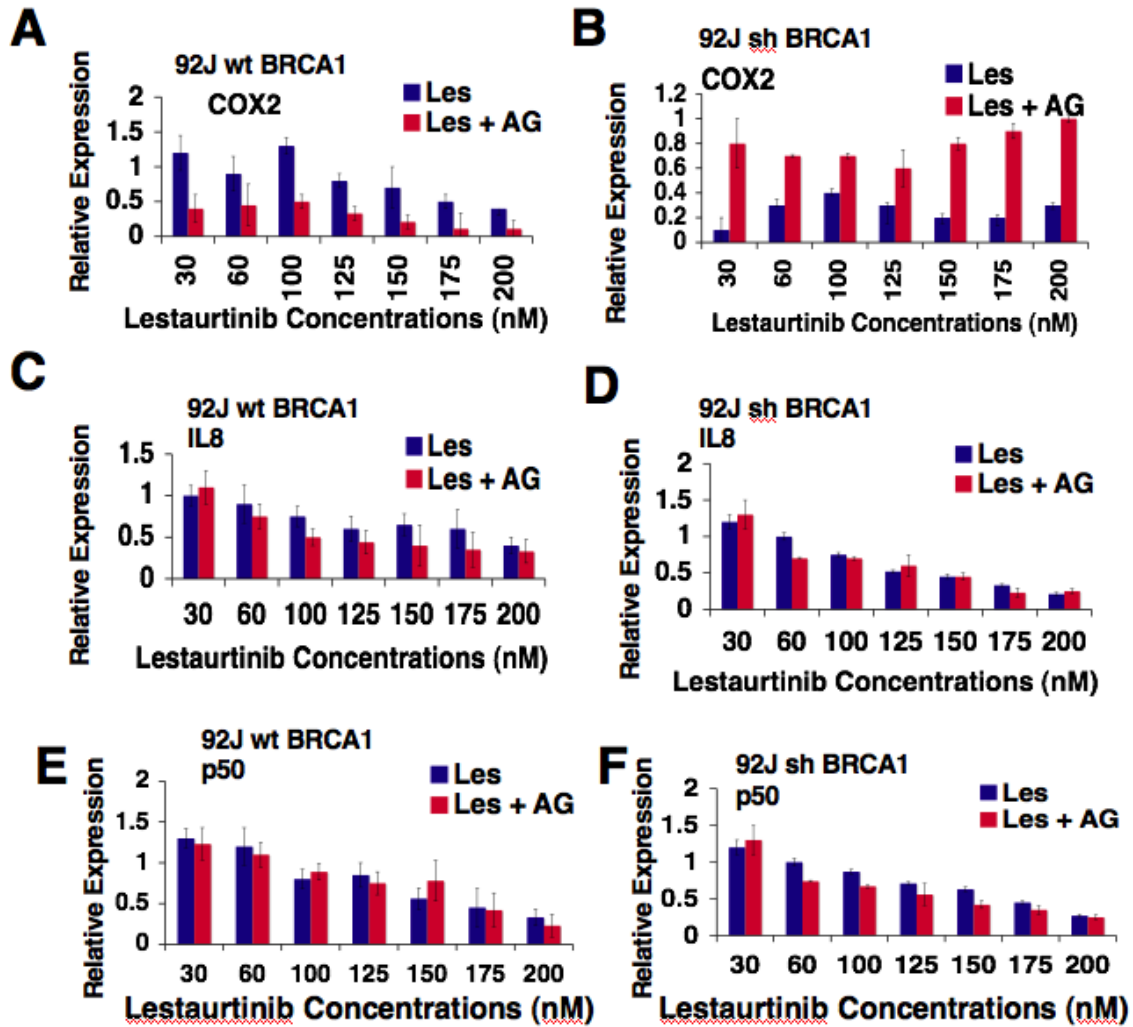

Additional File 4. Synergistic effect of lestaurnitinib in combination with AG14361 in Ras and 69 cell lines. Expression of *COX2* (A,B), *IL8* (C,D), and *p50* (E,F) in 92J pair of isogenic cells in the presence of AG14361 and/or various concentrations of lestaurnitinib for 24 hr revealed by real-time PCR. Data show the mean of three different readings and are marked by columns with  $\pm$  SD error bars.
